# Supplementary material
Source: ML conference proceedings conference paper supplement (https://proceedings.neurips.cc/paper_files/paper/2022/hash/65338cfb603d4871a2c38e53a3e039c9-Abstract.html)
Supplement: Supplementary file 1 [file 65338cfb603d4871a2c38e53a3e039c9-Supplemental-Conference.pdf]

## A Appendix

### A.1 Mathematical Details

#### A.1.1 Boundaries for counterfactual-prediction information

Following the introduction of the variational information bottleneck, we explain it as follows. Consider a Markov chain of  $o - \hat{u}^* - m$ , (substituting the  $X - Y - Z$  in the original IB and VIB), regarding the hidden representation of encoding  $\hat{u}^*$  of the input  $o$ , the goal of learning an encoding is to maximize the information about target  $m$  measured by the mutual information between encoding and the target  $I(\hat{u}^*; m)$ .

To prevent the encoding of data from being  $m = \hat{u}^*$ , which is not a useful representation, a constraint on the complexity can be applied to the mutual information as  $I(\hat{u}^*; m) \leq I_c$ , where  $I_c$  is the information constraint. This is equivalent to using the Lagrange multiplier  $\beta$  to maximize the objective function  $I(\hat{u}^*; m) - \beta I(\hat{u}^*; o)$ . Intuitively, as the first term is to encourage  $m$  to be predictive of  $\hat{u}^*$  while the second term is to encourage  $m$  to forget  $o$ . Essentially  $m$  is to act like a minimal sufficient statistic of  $o$  for predicting  $\hat{u}^*$  [19].

Then specifically for each agent  $i$ , we intend to encourage assistive information  $m_{-j}$  from other agents to agent  $j$  to memorize its  $u_j^*$  when assistive information from agent  $i$  is conditioned on observation  $o_j$ , while we encourage assistive information  $m_i$  from agent  $i$  to not depend directly on its own observation  $o_i$ .

To efficiently and effectively encode extra state information for individual value estimation, we consider this information encoding problem as an information bottleneck problem [19], the objective for each agent  $i$  can be written as:

$$J_{IB}(\theta_m) = \sum_{j=1}^n [I_{\theta_m}(\hat{u}_j^*; m_i | o_j, m_{-j}) - \beta I_{\theta_m}(m_i; o_i)] \quad (9)$$

This object is appealing because it defines what is a good representation in terms of trade-off between a succinct representation and inferencing ability. The main shortcoming is that the computation of the mutual information is computationally challenging. Inspired by the recent advancement in Bayesian inference and variational auto-encoder [40, 37, 11], we propose a novel way of representing it by utilizing latent vectors from variational inference models using information theoretical regularization method, and then derive the evidence lower bound (ELBO) of its objective.

**Lemma 1.** A lower bound of mutual information  $I_{\theta_m}(\hat{u}_j^*; m_i | o_j, m_{-j})$  is

$$\mathbb{E}_{o_i \sim \mathcal{D}, m_j \sim f_m} [-\mathcal{H}(p(\hat{u}_j^* | \mathbf{o}), q_\psi(\hat{u}_j^* | o_j, \mathbf{m}))]$$

where  $q_\psi$  is a variational Gaussian distribution with parameters  $\psi$  to approximate the unknown posterior  $p(\hat{u}_j^* | o_j, m_j)$ ,  $\mathbf{o} = \{o_1, o_2, \dots, o_n\}$ ,  $\mathbf{m} = \{m_1, m_2, \dots, m_n\}$ .

*Proof.*

$$\begin{aligned} & I_{\theta_m}(\hat{u}_j^*; m_i | o_j, m_{-j}) \\ &= \int d\hat{u}_j^* d o_j d m_{-j} p(\hat{u}_j^*, o_j, m_{-j}) \log \frac{p(\hat{u}_j^*, m_i | o_j, m_{-j})}{p(\hat{u}_j^* | o_j, m_{-j}) p(m_i | o_j, m_{-j})} \\ &= \int d\hat{u}_j^* d o_j d m_{-j} p(\hat{u}_j^*, o_j, m_{-j}) \log \frac{p(\hat{u}_j^* | o_j, m_{-j})}{p(\hat{u}_j^* | o_j, m_{-j})} \end{aligned}$$

where  $p(\hat{u}_j^* | o_j, m_{-j})$  is fully defined by our encoder and Markov Chain. Since this is intractable in our case, let  $q_\psi(\hat{u}_j^* | \tau_j, m_{-j})$  be a variational approximation to  $p(\hat{u}_j^* | o_j, m_{-j})$ , where this is our decoder which we will take to another neural network with its own set of parameters  $\psi$ . Using the fact that Kullback Leibler divergence is always positive, we have

$$KL[p(\hat{u}_j^* | o_j, m_{-j}), q_\psi(\hat{u}_j^* | \tau_j, m_{-j})] \geq 0$$

$$\int d\hat{u}_j^* d o_j d m_{-j} p(\hat{u}_j^*, o_j, m_{-j}) \log p(\hat{u}_j^* | o_j, m_{-j}) \geq \int d\hat{u}_j^* d o_j d m_{-j} p(\hat{u}_j^*, o_j, m_{-j}) \log q_\psi(\hat{u}_j^* | o_j, m_{-j})$$

and hence

$$\begin{aligned}
& I_{\theta_e}(\hat{u}_j^*; m_i | o_j, m_j) \\
& \geq \int d\hat{u}_j^* do_j dm_j p(\hat{u}_j^*, o_j, m_j) \log \frac{q_\psi(\hat{u}_j^* | o_j, m_j)}{p(\hat{u}_j^* | o_j, m_{-j})} \\
& = \int d\hat{u}_j^* do_j dm_j p(\hat{u}_j^*, o_j, m_j) \log q_\psi(\hat{u}_j^* | o_j, m_j) - \int d\hat{u}_j^* do_j dm_j p(\hat{u}_j^*, o_j, m_j) \log p(\hat{u}_j^* | o_j, m_{-j}) \\
& = \int d\hat{u}_j^* do_j dm_j p(o_j) p(m_j | o_j) p(\hat{u}_j^* | o_j) \log q_\psi(\hat{u}_j^* | o_j, m_j) + \mathcal{H}(\hat{u}_j^* | o_j, m_j) \\
& = \mathbb{E}_{\mathbf{o} \sim \mathcal{D}, m_j \sim f_m} \left( \int d\hat{u}_j^* p(\hat{u}_j^* | \mathbf{o}) \log q_\psi(\hat{u}_j^* | o_j, m_j) \right) + \mathcal{H}(\hat{u}_j^* | o_j, m_j) \\
& = \mathbb{E}_{\mathbf{o} \sim \mathcal{D}, m_j \sim f_m} [-\mathcal{H}[p(\hat{u}_j^* | \mathbf{o}), q_\psi(\hat{u}_j^* | o_j, \mathbf{m})]] + \mathcal{H}(\hat{u}_j^* | o_j, m_j)
\end{aligned}$$

Notice that the entropy of labels  $\mathcal{H}(\hat{u}_j^* | o_j, m_j)$  is an positive term that is independent of our optimization procedure and thus can be ignored. Then we have

$$I_{\theta_m}(\hat{u}_j^*; m_i | o_j, m_j) \geq \mathbb{E}_{\mathbf{o} \sim \mathcal{D}, m_j \sim f_m} [-\mathcal{H}[p(\hat{u}_j^* | \mathbf{o}), q_\psi(\hat{u}_j^* | o_j, \mathbf{m})]]$$

which is the lower bound of the first term in Eq.(2)  $\square$

**Lemma 2.** A lower bound of mutual information  $I_{\theta_m}(m_i; o_i)$  is

$$\mathbb{E}_{T_i \sim D, m_j \sim f_m} [\beta D_{\text{KL}}(p(m_i | o_i) \| q_\phi(m_i))]$$

where  $D_{\text{KL}}$  denotes Kullback-Leibler divergence operator and  $q_\phi(m_i)$  is a variational posterior estimator of  $p(m_i)$  with parameters  $\phi$ .

*Proof.*

$$\begin{aligned}
& I_{\theta_m}(M_i; T_i) \\
& = \int dm_i do_i p(m_i | o_i) p(o_i) \log \frac{p(m_i | o_i)}{p(m_i)} \\
& = \int dm_i do_i p(m_i | o_i) p(o_i) \log p(m_i | o_i) - \int dm_i do_i p(m_i | o_i) p(o_i) \log p(m_i)
\end{aligned}$$

Again,  $p(m_i)$  is fully defined by our encoder and Markov Chain, and when it is fully defined, computing the marginal distribution  $\int do_i p(m_i | o_i) P(o_i)$  might be difficult. So we use  $q_\phi(m_i)$  as a variational approximation to this marginal. Since  $KL[p(m_i), q_\phi(m_i)] \geq 0$ ,

We have

$$\int dm_i p(m_i) \log p(m_i) \geq \int dm_i p(m_i) \log q_\phi(m_i)$$

Then

$$\begin{aligned}
& I_{\theta_m}(M_i; T_i) \\
& \leq \int dm_i do_i p(m_i | o_i) p(o_i) \log p(m_i | o_i) - \int dm_i do_i p(m_i | o_i) p(o_i) \log q_\phi(m_i) \\
& = \int dm_i do_i p(m_i | o_i) p(o_i) \log \frac{p(m_i | o_i)}{q_\phi(m_i)} \\
& = \mathbb{E}_{o_i \sim D, m_j \sim f_m} [D_{\text{KL}}(p(m_i | o_i) \| q_\phi(m_i))]
\end{aligned}$$

$\square$

Combining **Lemma 1** and **Lemma 2**, we have the ELBO for the message encoding objective, which is to minimize

$$\mathcal{L}_{IB}(\theta_m) = \mathbb{E}_{o_i \sim \mathcal{D}, m_j \sim f_m} [-\mathcal{H}[p(\hat{u}_j^* | \mathbf{o}), q_\psi(\hat{u}_j^* | o_j, \mathbf{m})]] + \beta D_{\text{KL}}(p(m_i | o_i) \| q_\phi(m_i)) \quad (10)$$

### A.1.2 Factorized soft policy iteration

Recent works have shown that Boltzmann exploration policy iteration is guaranteed to improve the policy and converge to optimal with unlimited iterations and full policy evaluation, within MARL domain it can be defined as:

$$J(\pi) = \sum_t \mathbb{E} [r(\mathbf{s}_t, \mathbf{u}_t) + \alpha \mathcal{H}(\pi(\cdot | \mathbf{s}_t))]$$

In section 4 we give the factorized soft policy gradients as:

$$\begin{aligned} \mathcal{L}_{LP}(\pi) &= \mathbb{E}_{\mathcal{D}} [\alpha \log \pi(\mathbf{u}_t | \tau_t) - Q_{tot}^\pi(\mathbf{s}_t, \tau_t, \mathbf{u}_t, \mathbf{m}_t)] \\ &= -q^{\text{mix}}(\mathbf{s}_t, \mathbb{E}_{\pi^i} [q^i(\tau_t^i, \mathbf{u}_t^i, \mathbf{m}_t^i) - \alpha \log \pi^i(\mathbf{u}_t^i | \tau_t^i)]) \end{aligned} \quad (11)$$

We now derive it in detail, we use the aristocrat utility to perform credit assignment:

Let  $q^{\text{mix}}$  be the operator of a one-layer mixing network with no activation functions in the end whose parameters are generated from the hyper-network with input  $\mathbf{s}_t$ , then

$$\begin{aligned} & q^{\text{mix}}(\mathbf{s}_t, \mathbf{q}(\tau_t, a_t, m_t) - \alpha \log \pi(a_t | \tau_t)) \\ &= \sum_i [k^i(\mathbf{s}) \mathbb{E}_\pi [q^i(\tau_t^i, a_t^i, m_t^i)] - \sum_i [k^i(\mathbf{s}) \alpha^i \log \pi^i(a_t | \tau_t)] + b(\mathbf{s})] \\ & \quad (\text{ } k^i(\mathbf{s}) \text{ and } b^i(\mathbf{s}) \text{ are the corresponding weights and biases of } q^{\text{mix}} \text{ conditioned on } \mathbf{s}) \\ &= \mathbb{E}_\pi [Q_{tot}(\tau, \mathbf{a}, \mathbf{m}; \theta)] - \sum_i [k^i(\mathbf{s}) \mathbb{E}_\pi [\alpha^i \log \pi^i(a_t | \tau_t)]] \\ & \quad (q^{\text{mix}}(\mathbf{s}_t, \mathbf{q}(\tau_t, a_t, m_t)) = \sum_i [k^i(\mathbf{s}) \mathbb{E}_\pi [q^i(\tau_t^i, a_t^i, m_t^i)] + b(\mathbf{s}) = \mathbb{E}_\pi [Q_{tot}(\tau, \mathbf{a}, \mathbf{m}; \theta)] ) \\ & \quad (\mathbb{E}_\pi [Q_{tot}(\tau, \mathbf{a}, \mathbf{m}; \theta)] = \sum_{\mathbf{a}} \pi^i(a_t^i | \tau_t^i) \mathbb{E}_\pi [Q_{tot}(\tau, \mathbf{a}, \mathbf{m}; \theta)] ) \\ &= \mathbb{E}_\pi [Q_{tot}(\tau, \mathbf{a}, \mathbf{m}; \theta)] - \sum_i \mathbb{E}_\pi [\alpha \log \pi^i(a_t^i | \tau_t^i)] \\ & \quad (\text{let } \alpha^i = \frac{\alpha}{k^i(\mathbf{s})}) \\ &= \mathbb{E}_\pi [Q_{tot}(\tau, \mathbf{a}, \mathbf{m}; \theta)] - \sum_i \sum_{\pi} [\alpha \pi^i(a_t^i | \tau_t^i) \log \pi^i(a_t^i | \tau_t^i)] \\ &= \mathbb{E}_\pi [Q_{tot}(\tau, \mathbf{a}, \mathbf{m}; \theta)] - \sum_{\pi} \alpha \log \pi(a_t | \tau_t) \\ & \quad (\text{Assume } \pi = \prod \pi^i, \text{ then } \sum_i \sum_{\pi} [\alpha \pi^i(a_t^i | \tau_t^i) \log \pi^i(a_t^i | \tau_t^i)] = \sum_{\pi} \alpha \log \pi(a_t | \tau_t)) \\ &= \mathbb{E}_\pi [Q_{tot}^\pi(\mathbf{s}_t, \tau_t, \mathbf{a}_t) - \alpha \log \pi(a_t | \tau_t)] \end{aligned}$$

Which then complies to the original soft-actor-critic policy update policy.

We use the derivation above to show that directly using  $\mathbf{q}(\tau_t, a_t, m_t) - \alpha \log \pi(a_t | \tau_t)$  as input to feed in the mixing network to serve as soft-actor-critic policy update policy in a value decomposition method. It holds when using a single-layer mixing network without activation function, but nevertheless it offers insights of the proposed design, and when using relu activation function, it can be served as a lower bound object for optimization.

### A.2 Environment Details

We use more recent baselines (i.e., FOP and DOP) that are known to outperform QTRAN [5] and QPLEX [9] in the evaluation. In general, we tend to choose baselines that are more closely related to our work and most recent. This motivated the choice of QMIX (baseline for value-based factorization

---

**Algorithm 1** pseudocode for training PAC

---

```
1: for  $k = 0$  to  $max\_train\_steps$  do
2:   Initiate environment, critic network  $q$ , mixing network  $Q^*$ ,  $Q_{tot}$ , policy network  $\pi$ , message
   encoder  $m$ 
3:   Initiate Replay buffer  $\mathcal{D}$ 
4:   for  $t = 0$  to  $max\_episode\_limits$  do
5:     For each agent  $i$ , take action  $a_i \sim \pi_i$ 
6:     Execute joint action  $\mathbf{a}$ , observe reward  $r$ ,
       and observation  $\tau$ , next state  $s_{t+1}$ 
7:     Store  $(\tau, \mathbf{a}, r, \tau')$  in replay buffer  $\mathcal{D}$ 
8:   end for
9:   for  $t = 1$  to  $T$  do
10:    Sample trajectory minibatch  $\mathcal{B}$  from  $\mathcal{D}$ 
11:    Generate peer-assisted information
        $m_i \sim \mathcal{N}(f_m(o_i; \theta_m), \mathbf{I})$ , for  $i = 0$  to  $n$ 
12:    Calculate Loss
        $\mathcal{L}(\theta) = \mathcal{L}_{LP} + \mathcal{L}_{CA} + \mathcal{L}_{IB} + \mathcal{L}_{\hat{Q}^*} + \mathcal{L}_{Q_{tot}}$ 
13:    Update critic network and mixing network
        $\theta_{nn}(q, Q^*, Q_{tot}) \leftarrow \eta \hat{\nabla} \mathcal{L}(\theta)$ 
14:    Update policy network
        $\theta(\pi) \leftarrow \eta \hat{\nabla} \mathcal{L}(\pi)$ 
15:    Update encoding network
        $\theta_m(m) \leftarrow \eta \hat{\nabla} \mathcal{L}(\theta)$ 
16:    Update temperature parameter
        $\alpha \leftarrow \eta \hat{\nabla} \alpha$ 
17:    if  $t \bmod d = 0$  then
18:      Update target networks:  $\theta^- \leftarrow \theta$ 
19:    end if
20:  end for
21: end for
22: Return  $\pi$ 
```

---

methods), WQMIX (close to our work that uses weighted projections so better joint actions can be emphasized), NDQ [11] (which similarly uses common information to assist decision making but as generating messages for agent-wise communication), VDAC [14], FOP [13], DOP [12] (SOTA actor-critic based methods). Our code implementation is available at Github.

### A.2.1 Multi-State Matrix Game

To highlight the importance of the extra state information for an assisted value function factorization, we present a multi-state matrix game as inspired by the single-state matrix game proposed in [5] and present how our method performs compared with the existing works.

The multi-state matrix game and the detailed mlearning results for more algorithms as shown in table 1 and table 2.

The multi-state matrix game can be considered the single state matrix game with the same goal of factorizing the global value, consider an Markov decision process (MDP) consisting of 2 states with 0.5 transition probabilities between them and two payoff matrices shown in table 1(a). Suppose that agent 1 has the same partial observation  $o_1$  in states  $s^{(1)}$  and  $s^{(2)}$ . Then, its per-agent value function  $q_1(\cdot, \tau_1)$  computed from partial observation  $o_1$  are also the same in both states. Due to the monotonicity of the mixing network (even though it is provided with complete joint state information), for any  $u_1$  and  $u'_1$  with ordering  $q_1(u_1, \tau_1) \geq q_1(u'_1, \tau_1)$  without loss of generality, we must simultaneously have  $Q_{tot}(u_1, u_2, s^{(1)}) \geq Q_{tot}(u'_1, u_2, s^{(1)})$  and  $Q_{tot}(u_1, u_2, s^{(2)}) \geq Q_{tot}(u'_1, u_2, s^{(2)})$  for any action  $u_2$  of agent 2 in both states.

|                                                                                                                                                                                                                                                                                                                                           |                                             |            |            |         |            |            |      |      |         |      |      |      |         |      |      |      |                                                                                                                                                                                                                                                                                                                                           |   |            |         |            |            |      |      |            |            |            |      |      |         |      |      |      |                                                                                                                                                                                                                                                                                        |   |            |      |      |            |            |      |      |            |            |      |      |      |      |      |      |                                                                                                                                                                                                                                                                                         |   |            |      |            |            |      |      |            |            |            |      |      |      |      |      |      |
|-------------------------------------------------------------------------------------------------------------------------------------------------------------------------------------------------------------------------------------------------------------------------------------------------------------------------------------------|---------------------------------------------|------------|------------|---------|------------|------------|------|------|---------|------|------|------|---------|------|------|------|-------------------------------------------------------------------------------------------------------------------------------------------------------------------------------------------------------------------------------------------------------------------------------------------------------------------------------------------|---|------------|---------|------------|------------|------|------|------------|------------|------------|------|------|---------|------|------|------|----------------------------------------------------------------------------------------------------------------------------------------------------------------------------------------------------------------------------------------------------------------------------------------|---|------------|------|------|------------|------------|------|------|------------|------------|------|------|------|------|------|------|-----------------------------------------------------------------------------------------------------------------------------------------------------------------------------------------------------------------------------------------------------------------------------------------|---|------------|------|------------|------------|------|------|------------|------------|------------|------|------|------|------|------|------|
| <table> <tr><td>x</td><td><math>a_2^1</math></td><td><math>a_2^2</math></td><td><math>a_1^1</math></td></tr> <tr><td><math>a_1^1</math></td><td><b>4</b></td><td>-2</td><td>-2</td></tr> <tr><td><math>a_1^2</math></td><td>-2</td><td>0</td><td>0</td></tr> <tr><td><math>a_1^3</math></td><td>-2</td><td>0</td><td>0</td></tr> </table> | x                                           | $a_2^1$    | $a_2^2$    | $a_1^1$ | $a_1^1$    | <b>4</b>   | -2   | -2   | $a_1^2$ | -2   | 0    | 0    | $a_1^3$ | -2   | 0    | 0    | <table> <tr><td>x</td><td><math>a_2^1</math></td><td><math>a_2^2</math></td><td><math>a_1^1</math></td></tr> <tr><td><math>a_1^1</math></td><td>-2</td><td>0</td><td>0</td></tr> <tr><td><math>a_1^2</math></td><td><b>4</b></td><td>-2</td><td>-2</td></tr> <tr><td><math>a_1^3</math></td><td>-2</td><td>0</td><td>0</td></tr> </table> | x | $a_2^1$    | $a_2^2$ | $a_1^1$    | $a_1^1$    | -2   | 0    | 0          | $a_1^2$    | <b>4</b>   | -2   | -2   | $a_1^3$ | -2   | 0    | 0    | <table> <tr><td>x</td><td><b>0.3</b></td><td>-1.2</td><td>-2.6</td></tr> <tr><td>-0.2</td><td>0.1</td><td>-1.0</td><td>-1.0</td></tr> <tr><td><b>0.3</b></td><td><b>1.1</b></td><td>-0.9</td><td>-1.0</td></tr> <tr><td>-2.6</td><td>-1.0</td><td>-1.0</td><td>-1.0</td></tr> </table> | x | <b>0.3</b> | -1.2 | -2.6 | -0.2       | 0.1        | -1.0 | -1.0 | <b>0.3</b> | <b>1.1</b> | -0.9 | -1.0 | -2.6 | -1.0 | -1.0 | -1.0 | <table> <tr><td>x</td><td><b>0.4</b></td><td>-1.3</td><td>-2.2</td></tr> <tr><td>-0.2</td><td>0.4</td><td>-1.0</td><td>-1.0</td></tr> <tr><td><b>0.3</b></td><td><b>1.4</b></td><td>-0.9</td><td>-1.0</td></tr> <tr><td>-2.6</td><td>-1.0</td><td>-1.0</td><td>-1.0</td></tr> </table>  | x | <b>0.4</b> | -1.3 | -2.2       | -0.2       | 0.4  | -1.0 | -1.0       | <b>0.3</b> | <b>1.4</b> | -0.9 | -1.0 | -2.6 | -1.0 | -1.0 | -1.0 |
| x                                                                                                                                                                                                                                                                                                                                         | $a_2^1$                                     | $a_2^2$    | $a_1^1$    |         |            |            |      |      |         |      |      |      |         |      |      |      |                                                                                                                                                                                                                                                                                                                                           |   |            |         |            |            |      |      |            |            |            |      |      |         |      |      |      |                                                                                                                                                                                                                                                                                        |   |            |      |      |            |            |      |      |            |            |      |      |      |      |      |      |                                                                                                                                                                                                                                                                                         |   |            |      |            |            |      |      |            |            |            |      |      |      |      |      |      |
| $a_1^1$                                                                                                                                                                                                                                                                                                                                   | <b>4</b>                                    | -2         | -2         |         |            |            |      |      |         |      |      |      |         |      |      |      |                                                                                                                                                                                                                                                                                                                                           |   |            |         |            |            |      |      |            |            |            |      |      |         |      |      |      |                                                                                                                                                                                                                                                                                        |   |            |      |      |            |            |      |      |            |            |      |      |      |      |      |      |                                                                                                                                                                                                                                                                                         |   |            |      |            |            |      |      |            |            |            |      |      |      |      |      |      |
| $a_1^2$                                                                                                                                                                                                                                                                                                                                   | -2                                          | 0          | 0          |         |            |            |      |      |         |      |      |      |         |      |      |      |                                                                                                                                                                                                                                                                                                                                           |   |            |         |            |            |      |      |            |            |            |      |      |         |      |      |      |                                                                                                                                                                                                                                                                                        |   |            |      |      |            |            |      |      |            |            |      |      |      |      |      |      |                                                                                                                                                                                                                                                                                         |   |            |      |            |            |      |      |            |            |            |      |      |      |      |      |      |
| $a_1^3$                                                                                                                                                                                                                                                                                                                                   | -2                                          | 0          | 0          |         |            |            |      |      |         |      |      |      |         |      |      |      |                                                                                                                                                                                                                                                                                                                                           |   |            |         |            |            |      |      |            |            |            |      |      |         |      |      |      |                                                                                                                                                                                                                                                                                        |   |            |      |      |            |            |      |      |            |            |      |      |      |      |      |      |                                                                                                                                                                                                                                                                                         |   |            |      |            |            |      |      |            |            |            |      |      |      |      |      |      |
| x                                                                                                                                                                                                                                                                                                                                         | $a_2^1$                                     | $a_2^2$    | $a_1^1$    |         |            |            |      |      |         |      |      |      |         |      |      |      |                                                                                                                                                                                                                                                                                                                                           |   |            |         |            |            |      |      |            |            |            |      |      |         |      |      |      |                                                                                                                                                                                                                                                                                        |   |            |      |      |            |            |      |      |            |            |      |      |      |      |      |      |                                                                                                                                                                                                                                                                                         |   |            |      |            |            |      |      |            |            |            |      |      |      |      |      |      |
| $a_1^1$                                                                                                                                                                                                                                                                                                                                   | -2                                          | 0          | 0          |         |            |            |      |      |         |      |      |      |         |      |      |      |                                                                                                                                                                                                                                                                                                                                           |   |            |         |            |            |      |      |            |            |            |      |      |         |      |      |      |                                                                                                                                                                                                                                                                                        |   |            |      |      |            |            |      |      |            |            |      |      |      |      |      |      |                                                                                                                                                                                                                                                                                         |   |            |      |            |            |      |      |            |            |            |      |      |      |      |      |      |
| $a_1^2$                                                                                                                                                                                                                                                                                                                                   | <b>4</b>                                    | -2         | -2         |         |            |            |      |      |         |      |      |      |         |      |      |      |                                                                                                                                                                                                                                                                                                                                           |   |            |         |            |            |      |      |            |            |            |      |      |         |      |      |      |                                                                                                                                                                                                                                                                                        |   |            |      |      |            |            |      |      |            |            |      |      |      |      |      |      |                                                                                                                                                                                                                                                                                         |   |            |      |            |            |      |      |            |            |            |      |      |      |      |      |      |
| $a_1^3$                                                                                                                                                                                                                                                                                                                                   | -2                                          | 0          | 0          |         |            |            |      |      |         |      |      |      |         |      |      |      |                                                                                                                                                                                                                                                                                                                                           |   |            |         |            |            |      |      |            |            |            |      |      |         |      |      |      |                                                                                                                                                                                                                                                                                        |   |            |      |      |            |            |      |      |            |            |      |      |      |      |      |      |                                                                                                                                                                                                                                                                                         |   |            |      |            |            |      |      |            |            |            |      |      |      |      |      |      |
| x                                                                                                                                                                                                                                                                                                                                         | <b>0.3</b>                                  | -1.2       | -2.6       |         |            |            |      |      |         |      |      |      |         |      |      |      |                                                                                                                                                                                                                                                                                                                                           |   |            |         |            |            |      |      |            |            |            |      |      |         |      |      |      |                                                                                                                                                                                                                                                                                        |   |            |      |      |            |            |      |      |            |            |      |      |      |      |      |      |                                                                                                                                                                                                                                                                                         |   |            |      |            |            |      |      |            |            |            |      |      |      |      |      |      |
| -0.2                                                                                                                                                                                                                                                                                                                                      | 0.1                                         | -1.0       | -1.0       |         |            |            |      |      |         |      |      |      |         |      |      |      |                                                                                                                                                                                                                                                                                                                                           |   |            |         |            |            |      |      |            |            |            |      |      |         |      |      |      |                                                                                                                                                                                                                                                                                        |   |            |      |      |            |            |      |      |            |            |      |      |      |      |      |      |                                                                                                                                                                                                                                                                                         |   |            |      |            |            |      |      |            |            |            |      |      |      |      |      |      |
| <b>0.3</b>                                                                                                                                                                                                                                                                                                                                | <b>1.1</b>                                  | -0.9       | -1.0       |         |            |            |      |      |         |      |      |      |         |      |      |      |                                                                                                                                                                                                                                                                                                                                           |   |            |         |            |            |      |      |            |            |            |      |      |         |      |      |      |                                                                                                                                                                                                                                                                                        |   |            |      |      |            |            |      |      |            |            |      |      |      |      |      |      |                                                                                                                                                                                                                                                                                         |   |            |      |            |            |      |      |            |            |            |      |      |      |      |      |      |
| -2.6                                                                                                                                                                                                                                                                                                                                      | -1.0                                        | -1.0       | -1.0       |         |            |            |      |      |         |      |      |      |         |      |      |      |                                                                                                                                                                                                                                                                                                                                           |   |            |         |            |            |      |      |            |            |            |      |      |         |      |      |      |                                                                                                                                                                                                                                                                                        |   |            |      |      |            |            |      |      |            |            |      |      |      |      |      |      |                                                                                                                                                                                                                                                                                         |   |            |      |            |            |      |      |            |            |            |      |      |      |      |      |      |
| x                                                                                                                                                                                                                                                                                                                                         | <b>0.4</b>                                  | -1.3       | -2.2       |         |            |            |      |      |         |      |      |      |         |      |      |      |                                                                                                                                                                                                                                                                                                                                           |   |            |         |            |            |      |      |            |            |            |      |      |         |      |      |      |                                                                                                                                                                                                                                                                                        |   |            |      |      |            |            |      |      |            |            |      |      |      |      |      |      |                                                                                                                                                                                                                                                                                         |   |            |      |            |            |      |      |            |            |            |      |      |      |      |      |      |
| -0.2                                                                                                                                                                                                                                                                                                                                      | 0.4                                         | -1.0       | -1.0       |         |            |            |      |      |         |      |      |      |         |      |      |      |                                                                                                                                                                                                                                                                                                                                           |   |            |         |            |            |      |      |            |            |            |      |      |         |      |      |      |                                                                                                                                                                                                                                                                                        |   |            |      |      |            |            |      |      |            |            |      |      |      |      |      |      |                                                                                                                                                                                                                                                                                         |   |            |      |            |            |      |      |            |            |            |      |      |      |      |      |      |
| <b>0.3</b>                                                                                                                                                                                                                                                                                                                                | <b>1.4</b>                                  | -0.9       | -1.0       |         |            |            |      |      |         |      |      |      |         |      |      |      |                                                                                                                                                                                                                                                                                                                                           |   |            |         |            |            |      |      |            |            |            |      |      |         |      |      |      |                                                                                                                                                                                                                                                                                        |   |            |      |      |            |            |      |      |            |            |      |      |      |      |      |      |                                                                                                                                                                                                                                                                                         |   |            |      |            |            |      |      |            |            |            |      |      |      |      |      |      |
| -2.6                                                                                                                                                                                                                                                                                                                                      | -1.0                                        | -1.0       | -1.0       |         |            |            |      |      |         |      |      |      |         |      |      |      |                                                                                                                                                                                                                                                                                                                                           |   |            |         |            |            |      |      |            |            |            |      |      |         |      |      |      |                                                                                                                                                                                                                                                                                        |   |            |      |      |            |            |      |      |            |            |      |      |      |      |      |      |                                                                                                                                                                                                                                                                                         |   |            |      |            |            |      |      |            |            |            |      |      |      |      |      |      |
| (a) Payoff matrix for state $s_1$ and $s_2$                                                                                                                                                                                                                                                                                               | (b) QMIX: $Q_{tot}(s_1), Q_{tot}(s_2)$      |            |            |         |            |            |      |      |         |      |      |      |         |      |      |      |                                                                                                                                                                                                                                                                                                                                           |   |            |         |            |            |      |      |            |            |            |      |      |         |      |      |      |                                                                                                                                                                                                                                                                                        |   |            |      |      |            |            |      |      |            |            |      |      |      |      |      |      |                                                                                                                                                                                                                                                                                         |   |            |      |            |            |      |      |            |            |            |      |      |      |      |      |      |
| <table> <tr><td>x</td><td>1.0</td><td>0.2</td><td>0.2</td></tr> <tr><td>1.0</td><td><b>4.0</b></td><td>-1.2</td><td>-1.2</td></tr> <tr><td>0.0</td><td>-0.2</td><td>-1.6</td><td>-1.6</td></tr> <tr><td>0.0</td><td>-0.2</td><td>-1.6</td><td>-1.6</td></tr> </table>                                                                     | x                                           | 1.0        | 0.2        | 0.2     | 1.0        | <b>4.0</b> | -1.2 | -1.2 | 0.0     | -0.2 | -1.6 | -1.6 | 0.0     | -0.2 | -1.6 | -1.6 | <table> <tr><td>x</td><td>0.0</td><td>0.5</td><td><b>0.5</b></td></tr> <tr><td><b>1.0</b></td><td>-1.2</td><td>0.1</td><td><b>0.1</b></td></tr> <tr><td>0.0</td><td>-1.6</td><td>-1.2</td><td>-1.2</td></tr> <tr><td>0.0</td><td>-1.6</td><td>-1.2</td><td>-1.2</td></tr> </table>                                                        | x | 0.0        | 0.5     | <b>0.5</b> | <b>1.0</b> | -1.2 | 0.1  | <b>0.1</b> | 0.0        | -1.6       | -1.2 | -1.2 | 0.0     | -1.6 | -1.2 | -1.2 | <table> <tr><td>x</td><td>1.0</td><td>0.2</td><td>0.2</td></tr> <tr><td>1.0</td><td><b>4.0</b></td><td>-1.8</td><td>-1.9</td></tr> <tr><td>0.0</td><td>-1.9</td><td>0.0</td><td>0.1</td></tr> <tr><td>0.0</td><td>-2.1</td><td>-0.1</td><td>0.0</td></tr> </table>                     | x | 1.0        | 0.2  | 0.2  | 1.0        | <b>4.0</b> | -1.8 | -1.9 | 0.0        | -1.9       | 0.0  | 0.1  | 0.0  | -2.1 | -0.1 | 0.0  | <table> <tr><td>x</td><td>0.0</td><td>0.5</td><td><b>0.5</b></td></tr> <tr><td><b>1.0</b></td><td>-2.0</td><td>0.0</td><td><b>0.0</b></td></tr> <tr><td>0.0</td><td>0.1</td><td>-2.0</td><td>-2.0</td></tr> <tr><td>0.0</td><td>-2.2</td><td>-0.0</td><td>-0.0</td></tr> </table>       | x | 0.0        | 0.5  | <b>0.5</b> | <b>1.0</b> | -2.0 | 0.0  | <b>0.0</b> | 0.0        | 0.1        | -2.0 | -2.0 | 0.0  | -2.2 | -0.0 | -0.0 |
| x                                                                                                                                                                                                                                                                                                                                         | 1.0                                         | 0.2        | 0.2        |         |            |            |      |      |         |      |      |      |         |      |      |      |                                                                                                                                                                                                                                                                                                                                           |   |            |         |            |            |      |      |            |            |            |      |      |         |      |      |      |                                                                                                                                                                                                                                                                                        |   |            |      |      |            |            |      |      |            |            |      |      |      |      |      |      |                                                                                                                                                                                                                                                                                         |   |            |      |            |            |      |      |            |            |            |      |      |      |      |      |      |
| 1.0                                                                                                                                                                                                                                                                                                                                       | <b>4.0</b>                                  | -1.2       | -1.2       |         |            |            |      |      |         |      |      |      |         |      |      |      |                                                                                                                                                                                                                                                                                                                                           |   |            |         |            |            |      |      |            |            |            |      |      |         |      |      |      |                                                                                                                                                                                                                                                                                        |   |            |      |      |            |            |      |      |            |            |      |      |      |      |      |      |                                                                                                                                                                                                                                                                                         |   |            |      |            |            |      |      |            |            |            |      |      |      |      |      |      |
| 0.0                                                                                                                                                                                                                                                                                                                                       | -0.2                                        | -1.6       | -1.6       |         |            |            |      |      |         |      |      |      |         |      |      |      |                                                                                                                                                                                                                                                                                                                                           |   |            |         |            |            |      |      |            |            |            |      |      |         |      |      |      |                                                                                                                                                                                                                                                                                        |   |            |      |      |            |            |      |      |            |            |      |      |      |      |      |      |                                                                                                                                                                                                                                                                                         |   |            |      |            |            |      |      |            |            |            |      |      |      |      |      |      |
| 0.0                                                                                                                                                                                                                                                                                                                                       | -0.2                                        | -1.6       | -1.6       |         |            |            |      |      |         |      |      |      |         |      |      |      |                                                                                                                                                                                                                                                                                                                                           |   |            |         |            |            |      |      |            |            |            |      |      |         |      |      |      |                                                                                                                                                                                                                                                                                        |   |            |      |      |            |            |      |      |            |            |      |      |      |      |      |      |                                                                                                                                                                                                                                                                                         |   |            |      |            |            |      |      |            |            |            |      |      |      |      |      |      |
| x                                                                                                                                                                                                                                                                                                                                         | 0.0                                         | 0.5        | <b>0.5</b> |         |            |            |      |      |         |      |      |      |         |      |      |      |                                                                                                                                                                                                                                                                                                                                           |   |            |         |            |            |      |      |            |            |            |      |      |         |      |      |      |                                                                                                                                                                                                                                                                                        |   |            |      |      |            |            |      |      |            |            |      |      |      |      |      |      |                                                                                                                                                                                                                                                                                         |   |            |      |            |            |      |      |            |            |            |      |      |      |      |      |      |
| <b>1.0</b>                                                                                                                                                                                                                                                                                                                                | -1.2                                        | 0.1        | <b>0.1</b> |         |            |            |      |      |         |      |      |      |         |      |      |      |                                                                                                                                                                                                                                                                                                                                           |   |            |         |            |            |      |      |            |            |            |      |      |         |      |      |      |                                                                                                                                                                                                                                                                                        |   |            |      |      |            |            |      |      |            |            |      |      |      |      |      |      |                                                                                                                                                                                                                                                                                         |   |            |      |            |            |      |      |            |            |            |      |      |      |      |      |      |
| 0.0                                                                                                                                                                                                                                                                                                                                       | -1.6                                        | -1.2       | -1.2       |         |            |            |      |      |         |      |      |      |         |      |      |      |                                                                                                                                                                                                                                                                                                                                           |   |            |         |            |            |      |      |            |            |            |      |      |         |      |      |      |                                                                                                                                                                                                                                                                                        |   |            |      |      |            |            |      |      |            |            |      |      |      |      |      |      |                                                                                                                                                                                                                                                                                         |   |            |      |            |            |      |      |            |            |            |      |      |      |      |      |      |
| 0.0                                                                                                                                                                                                                                                                                                                                       | -1.6                                        | -1.2       | -1.2       |         |            |            |      |      |         |      |      |      |         |      |      |      |                                                                                                                                                                                                                                                                                                                                           |   |            |         |            |            |      |      |            |            |            |      |      |         |      |      |      |                                                                                                                                                                                                                                                                                        |   |            |      |      |            |            |      |      |            |            |      |      |      |      |      |      |                                                                                                                                                                                                                                                                                         |   |            |      |            |            |      |      |            |            |            |      |      |      |      |      |      |
| x                                                                                                                                                                                                                                                                                                                                         | 1.0                                         | 0.2        | 0.2        |         |            |            |      |      |         |      |      |      |         |      |      |      |                                                                                                                                                                                                                                                                                                                                           |   |            |         |            |            |      |      |            |            |            |      |      |         |      |      |      |                                                                                                                                                                                                                                                                                        |   |            |      |      |            |            |      |      |            |            |      |      |      |      |      |      |                                                                                                                                                                                                                                                                                         |   |            |      |            |            |      |      |            |            |            |      |      |      |      |      |      |
| 1.0                                                                                                                                                                                                                                                                                                                                       | <b>4.0</b>                                  | -1.8       | -1.9       |         |            |            |      |      |         |      |      |      |         |      |      |      |                                                                                                                                                                                                                                                                                                                                           |   |            |         |            |            |      |      |            |            |            |      |      |         |      |      |      |                                                                                                                                                                                                                                                                                        |   |            |      |      |            |            |      |      |            |            |      |      |      |      |      |      |                                                                                                                                                                                                                                                                                         |   |            |      |            |            |      |      |            |            |            |      |      |      |      |      |      |
| 0.0                                                                                                                                                                                                                                                                                                                                       | -1.9                                        | 0.0        | 0.1        |         |            |            |      |      |         |      |      |      |         |      |      |      |                                                                                                                                                                                                                                                                                                                                           |   |            |         |            |            |      |      |            |            |            |      |      |         |      |      |      |                                                                                                                                                                                                                                                                                        |   |            |      |      |            |            |      |      |            |            |      |      |      |      |      |      |                                                                                                                                                                                                                                                                                         |   |            |      |            |            |      |      |            |            |            |      |      |      |      |      |      |
| 0.0                                                                                                                                                                                                                                                                                                                                       | -2.1                                        | -0.1       | 0.0        |         |            |            |      |      |         |      |      |      |         |      |      |      |                                                                                                                                                                                                                                                                                                                                           |   |            |         |            |            |      |      |            |            |            |      |      |         |      |      |      |                                                                                                                                                                                                                                                                                        |   |            |      |      |            |            |      |      |            |            |      |      |      |      |      |      |                                                                                                                                                                                                                                                                                         |   |            |      |            |            |      |      |            |            |            |      |      |      |      |      |      |
| x                                                                                                                                                                                                                                                                                                                                         | 0.0                                         | 0.5        | <b>0.5</b> |         |            |            |      |      |         |      |      |      |         |      |      |      |                                                                                                                                                                                                                                                                                                                                           |   |            |         |            |            |      |      |            |            |            |      |      |         |      |      |      |                                                                                                                                                                                                                                                                                        |   |            |      |      |            |            |      |      |            |            |      |      |      |      |      |      |                                                                                                                                                                                                                                                                                         |   |            |      |            |            |      |      |            |            |            |      |      |      |      |      |      |
| <b>1.0</b>                                                                                                                                                                                                                                                                                                                                | -2.0                                        | 0.0        | <b>0.0</b> |         |            |            |      |      |         |      |      |      |         |      |      |      |                                                                                                                                                                                                                                                                                                                                           |   |            |         |            |            |      |      |            |            |            |      |      |         |      |      |      |                                                                                                                                                                                                                                                                                        |   |            |      |      |            |            |      |      |            |            |      |      |      |      |      |      |                                                                                                                                                                                                                                                                                         |   |            |      |            |            |      |      |            |            |            |      |      |      |      |      |      |
| 0.0                                                                                                                                                                                                                                                                                                                                       | 0.1                                         | -2.0       | -2.0       |         |            |            |      |      |         |      |      |      |         |      |      |      |                                                                                                                                                                                                                                                                                                                                           |   |            |         |            |            |      |      |            |            |            |      |      |         |      |      |      |                                                                                                                                                                                                                                                                                        |   |            |      |      |            |            |      |      |            |            |      |      |      |      |      |      |                                                                                                                                                                                                                                                                                         |   |            |      |            |            |      |      |            |            |            |      |      |      |      |      |      |
| 0.0                                                                                                                                                                                                                                                                                                                                       | -2.2                                        | -0.0       | -0.0       |         |            |            |      |      |         |      |      |      |         |      |      |      |                                                                                                                                                                                                                                                                                                                                           |   |            |         |            |            |      |      |            |            |            |      |      |         |      |      |      |                                                                                                                                                                                                                                                                                        |   |            |      |      |            |            |      |      |            |            |      |      |      |      |      |      |                                                                                                                                                                                                                                                                                         |   |            |      |            |            |      |      |            |            |            |      |      |      |      |      |      |
| (c) WQMIX: $Q_{tot}(s_1), Q_{tot}(s_2)$                                                                                                                                                                                                                                                                                                   | (d) WQMIX: $\hat{Q}^*(s_1), \hat{Q}^*(s_2)$ |            |            |         |            |            |      |      |         |      |      |      |         |      |      |      |                                                                                                                                                                                                                                                                                                                                           |   |            |         |            |            |      |      |            |            |            |      |      |         |      |      |      |                                                                                                                                                                                                                                                                                        |   |            |      |      |            |            |      |      |            |            |      |      |      |      |      |      |                                                                                                                                                                                                                                                                                         |   |            |      |            |            |      |      |            |            |            |      |      |      |      |      |      |
| <table> <tr><td>x</td><td><b>0.7</b></td><td>-2.0</td><td>-2.1</td></tr> <tr><td><b>0.7</b></td><td><b>4.0</b></td><td>-2.1</td><td>-2.4</td></tr> <tr><td>-2.0</td><td>-2.1</td><td>-2.4</td><td>-2.4</td></tr> <tr><td>-2.1</td><td>-2.1</td><td>-2.4</td><td>-2.4</td></tr> </table>                                                   | x                                           | <b>0.7</b> | -2.0       | -2.1    | <b>0.7</b> | <b>4.0</b> | -2.1 | -2.4 | -2.0    | -2.1 | -2.4 | -2.4 | -2.1    | -2.1 | -2.4 | -2.4 | <table> <tr><td>x</td><td><b>0.6</b></td><td>-2.0</td><td>-2.0</td></tr> <tr><td>-1.2</td><td>-1.8</td><td>-2.5</td><td>-2.5</td></tr> <tr><td><b>1.6</b></td><td><b>4.0</b></td><td>-2.0</td><td>-2.0</td></tr> <tr><td>-1.8</td><td>-2.1</td><td>-2.5</td><td>-2.5</td></tr> </table>                                                   | x | <b>0.6</b> | -2.0    | -2.0       | -1.2       | -1.8 | -2.5 | -2.5       | <b>1.6</b> | <b>4.0</b> | -2.0 | -2.0 | -1.8    | -2.1 | -2.5 | -2.5 | <table> <tr><td>x</td><td><b>0.7</b></td><td>-2.0</td><td>-2.1</td></tr> <tr><td><b>0.7</b></td><td>4.0</td><td>-2.1</td><td>-2.1</td></tr> <tr><td>-2.0</td><td>-2.1</td><td>-0.1</td><td>-0.1</td></tr> <tr><td>-2.1</td><td>-2.1</td><td>-0.1</td><td>-0.1</td></tr> </table>       | x | <b>0.7</b> | -2.0 | -2.1 | <b>0.7</b> | 4.0        | -2.1 | -2.1 | -2.0       | -2.1       | -0.1 | -0.1 | -2.1 | -2.1 | -0.1 | -0.1 | <table> <tr><td>x</td><td><b>0.7</b></td><td>-2.0</td><td>-2.1</td></tr> <tr><td>-1.2</td><td>-2.1</td><td>-0.0</td><td>-0.0</td></tr> <tr><td><b>1.6</b></td><td><b>4.0</b></td><td>-2.0</td><td>-2.0</td></tr> <tr><td>-1.8</td><td>-2.1</td><td>-0.0</td><td>-0.0</td></tr> </table> | x | <b>0.7</b> | -2.0 | -2.1       | -1.2       | -2.1 | -0.0 | -0.0       | <b>1.6</b> | <b>4.0</b> | -2.0 | -2.0 | -1.8 | -2.1 | -0.0 | -0.0 |
| x                                                                                                                                                                                                                                                                                                                                         | <b>0.7</b>                                  | -2.0       | -2.1       |         |            |            |      |      |         |      |      |      |         |      |      |      |                                                                                                                                                                                                                                                                                                                                           |   |            |         |            |            |      |      |            |            |            |      |      |         |      |      |      |                                                                                                                                                                                                                                                                                        |   |            |      |      |            |            |      |      |            |            |      |      |      |      |      |      |                                                                                                                                                                                                                                                                                         |   |            |      |            |            |      |      |            |            |            |      |      |      |      |      |      |
| <b>0.7</b>                                                                                                                                                                                                                                                                                                                                | <b>4.0</b>                                  | -2.1       | -2.4       |         |            |            |      |      |         |      |      |      |         |      |      |      |                                                                                                                                                                                                                                                                                                                                           |   |            |         |            |            |      |      |            |            |            |      |      |         |      |      |      |                                                                                                                                                                                                                                                                                        |   |            |      |      |            |            |      |      |            |            |      |      |      |      |      |      |                                                                                                                                                                                                                                                                                         |   |            |      |            |            |      |      |            |            |            |      |      |      |      |      |      |
| -2.0                                                                                                                                                                                                                                                                                                                                      | -2.1                                        | -2.4       | -2.4       |         |            |            |      |      |         |      |      |      |         |      |      |      |                                                                                                                                                                                                                                                                                                                                           |   |            |         |            |            |      |      |            |            |            |      |      |         |      |      |      |                                                                                                                                                                                                                                                                                        |   |            |      |      |            |            |      |      |            |            |      |      |      |      |      |      |                                                                                                                                                                                                                                                                                         |   |            |      |            |            |      |      |            |            |            |      |      |      |      |      |      |
| -2.1                                                                                                                                                                                                                                                                                                                                      | -2.1                                        | -2.4       | -2.4       |         |            |            |      |      |         |      |      |      |         |      |      |      |                                                                                                                                                                                                                                                                                                                                           |   |            |         |            |            |      |      |            |            |            |      |      |         |      |      |      |                                                                                                                                                                                                                                                                                        |   |            |      |      |            |            |      |      |            |            |      |      |      |      |      |      |                                                                                                                                                                                                                                                                                         |   |            |      |            |            |      |      |            |            |            |      |      |      |      |      |      |
| x                                                                                                                                                                                                                                                                                                                                         | <b>0.6</b>                                  | -2.0       | -2.0       |         |            |            |      |      |         |      |      |      |         |      |      |      |                                                                                                                                                                                                                                                                                                                                           |   |            |         |            |            |      |      |            |            |            |      |      |         |      |      |      |                                                                                                                                                                                                                                                                                        |   |            |      |      |            |            |      |      |            |            |      |      |      |      |      |      |                                                                                                                                                                                                                                                                                         |   |            |      |            |            |      |      |            |            |            |      |      |      |      |      |      |
| -1.2                                                                                                                                                                                                                                                                                                                                      | -1.8                                        | -2.5       | -2.5       |         |            |            |      |      |         |      |      |      |         |      |      |      |                                                                                                                                                                                                                                                                                                                                           |   |            |         |            |            |      |      |            |            |            |      |      |         |      |      |      |                                                                                                                                                                                                                                                                                        |   |            |      |      |            |            |      |      |            |            |      |      |      |      |      |      |                                                                                                                                                                                                                                                                                         |   |            |      |            |            |      |      |            |            |            |      |      |      |      |      |      |
| <b>1.6</b>                                                                                                                                                                                                                                                                                                                                | <b>4.0</b>                                  | -2.0       | -2.0       |         |            |            |      |      |         |      |      |      |         |      |      |      |                                                                                                                                                                                                                                                                                                                                           |   |            |         |            |            |      |      |            |            |            |      |      |         |      |      |      |                                                                                                                                                                                                                                                                                        |   |            |      |      |            |            |      |      |            |            |      |      |      |      |      |      |                                                                                                                                                                                                                                                                                         |   |            |      |            |            |      |      |            |            |            |      |      |      |      |      |      |
| -1.8                                                                                                                                                                                                                                                                                                                                      | -2.1                                        | -2.5       | -2.5       |         |            |            |      |      |         |      |      |      |         |      |      |      |                                                                                                                                                                                                                                                                                                                                           |   |            |         |            |            |      |      |            |            |            |      |      |         |      |      |      |                                                                                                                                                                                                                                                                                        |   |            |      |      |            |            |      |      |            |            |      |      |      |      |      |      |                                                                                                                                                                                                                                                                                         |   |            |      |            |            |      |      |            |            |            |      |      |      |      |      |      |
| x                                                                                                                                                                                                                                                                                                                                         | <b>0.7</b>                                  | -2.0       | -2.1       |         |            |            |      |      |         |      |      |      |         |      |      |      |                                                                                                                                                                                                                                                                                                                                           |   |            |         |            |            |      |      |            |            |            |      |      |         |      |      |      |                                                                                                                                                                                                                                                                                        |   |            |      |      |            |            |      |      |            |            |      |      |      |      |      |      |                                                                                                                                                                                                                                                                                         |   |            |      |            |            |      |      |            |            |            |      |      |      |      |      |      |
| <b>0.7</b>                                                                                                                                                                                                                                                                                                                                | 4.0                                         | -2.1       | -2.1       |         |            |            |      |      |         |      |      |      |         |      |      |      |                                                                                                                                                                                                                                                                                                                                           |   |            |         |            |            |      |      |            |            |            |      |      |         |      |      |      |                                                                                                                                                                                                                                                                                        |   |            |      |      |            |            |      |      |            |            |      |      |      |      |      |      |                                                                                                                                                                                                                                                                                         |   |            |      |            |            |      |      |            |            |            |      |      |      |      |      |      |
| -2.0                                                                                                                                                                                                                                                                                                                                      | -2.1                                        | -0.1       | -0.1       |         |            |            |      |      |         |      |      |      |         |      |      |      |                                                                                                                                                                                                                                                                                                                                           |   |            |         |            |            |      |      |            |            |            |      |      |         |      |      |      |                                                                                                                                                                                                                                                                                        |   |            |      |      |            |            |      |      |            |            |      |      |      |      |      |      |                                                                                                                                                                                                                                                                                         |   |            |      |            |            |      |      |            |            |            |      |      |      |      |      |      |
| -2.1                                                                                                                                                                                                                                                                                                                                      | -2.1                                        | -0.1       | -0.1       |         |            |            |      |      |         |      |      |      |         |      |      |      |                                                                                                                                                                                                                                                                                                                                           |   |            |         |            |            |      |      |            |            |            |      |      |         |      |      |      |                                                                                                                                                                                                                                                                                        |   |            |      |      |            |            |      |      |            |            |      |      |      |      |      |      |                                                                                                                                                                                                                                                                                         |   |            |      |            |            |      |      |            |            |            |      |      |      |      |      |      |
| x                                                                                                                                                                                                                                                                                                                                         | <b>0.7</b>                                  | -2.0       | -2.1       |         |            |            |      |      |         |      |      |      |         |      |      |      |                                                                                                                                                                                                                                                                                                                                           |   |            |         |            |            |      |      |            |            |            |      |      |         |      |      |      |                                                                                                                                                                                                                                                                                        |   |            |      |      |            |            |      |      |            |            |      |      |      |      |      |      |                                                                                                                                                                                                                                                                                         |   |            |      |            |            |      |      |            |            |            |      |      |      |      |      |      |
| -1.2                                                                                                                                                                                                                                                                                                                                      | -2.1                                        | -0.0       | -0.0       |         |            |            |      |      |         |      |      |      |         |      |      |      |                                                                                                                                                                                                                                                                                                                                           |   |            |         |            |            |      |      |            |            |            |      |      |         |      |      |      |                                                                                                                                                                                                                                                                                        |   |            |      |      |            |            |      |      |            |            |      |      |      |      |      |      |                                                                                                                                                                                                                                                                                         |   |            |      |            |            |      |      |            |            |            |      |      |      |      |      |      |
| <b>1.6</b>                                                                                                                                                                                                                                                                                                                                | <b>4.0</b>                                  | -2.0       | -2.0       |         |            |            |      |      |         |      |      |      |         |      |      |      |                                                                                                                                                                                                                                                                                                                                           |   |            |         |            |            |      |      |            |            |            |      |      |         |      |      |      |                                                                                                                                                                                                                                                                                        |   |            |      |      |            |            |      |      |            |            |      |      |      |      |      |      |                                                                                                                                                                                                                                                                                         |   |            |      |            |            |      |      |            |            |            |      |      |      |      |      |      |
| -1.8                                                                                                                                                                                                                                                                                                                                      | -2.1                                        | -0.0       | -0.0       |         |            |            |      |      |         |      |      |      |         |      |      |      |                                                                                                                                                                                                                                                                                                                                           |   |            |         |            |            |      |      |            |            |            |      |      |         |      |      |      |                                                                                                                                                                                                                                                                                        |   |            |      |      |            |            |      |      |            |            |      |      |      |      |      |      |                                                                                                                                                                                                                                                                                         |   |            |      |            |            |      |      |            |            |            |      |      |      |      |      |      |
| (e) OURS: $Q_{tot}(s_1), Q_{tot}(s_2)$                                                                                                                                                                                                                                                                                                    | (f) OURS: $\hat{Q}^*(s_1), \hat{Q}^*(s_2)$  |            |            |         |            |            |      |      |         |      |      |      |         |      |      |      |                                                                                                                                                                                                                                                                                                                                           |   |            |         |            |            |      |      |            |            |            |      |      |         |      |      |      |                                                                                                                                                                                                                                                                                        |   |            |      |      |            |            |      |      |            |            |      |      |      |      |      |      |                                                                                                                                                                                                                                                                                         |   |            |      |            |            |      |      |            |            |            |      |      |      |      |      |      |

Table 1: Payoff matrix of the one-step multi-state non-monotonic cooperative matrix game and reconstructed results from corresponding baselines. State  $s_1$  and  $s_2$  are selectet randomly on equal probability. Boldface indicates the local and joint optimal actions from local utilities and action-state value function.

|                                                                                                                                                                                                                                                                               |                                         |            |      |     |            |            |     |      |            |            |     |      |     |     |     |     |                                                                                                                                                                                                                                                                               |   |            |     |     |            |            |     |      |            |            |     |      |     |     |     |     |                                                                                                                                                                                                                                                                                    |   |            |     |      |            |            |      |      |            |            |      |      |     |      |      |      |                                                                                                                                                                                                                                                                                    |   |            |     |      |            |            |      |      |     |      |      |      |     |      |      |      |
|-------------------------------------------------------------------------------------------------------------------------------------------------------------------------------------------------------------------------------------------------------------------------------|-----------------------------------------|------------|------|-----|------------|------------|-----|------|------------|------------|-----|------|-----|-----|-----|-----|-------------------------------------------------------------------------------------------------------------------------------------------------------------------------------------------------------------------------------------------------------------------------------|---|------------|-----|-----|------------|------------|-----|------|------------|------------|-----|------|-----|-----|-----|-----|------------------------------------------------------------------------------------------------------------------------------------------------------------------------------------------------------------------------------------------------------------------------------------|---|------------|-----|------|------------|------------|------|------|------------|------------|------|------|-----|------|------|------|------------------------------------------------------------------------------------------------------------------------------------------------------------------------------------------------------------------------------------------------------------------------------------|---|------------|-----|------|------------|------------|------|------|-----|------|------|------|-----|------|------|------|
| <table> <tr><td>x</td><td><b>0.7</b></td><td>0.2</td><td>0.2</td></tr> <tr><td>0.2</td><td>0.4</td><td>0.2</td><td>-0.2</td></tr> <tr><td><b>0.7</b></td><td><b>0.7</b></td><td>0.4</td><td>-0.4</td></tr> <tr><td>0.2</td><td>0.4</td><td>0.2</td><td>0.2</td></tr> </table> | x                                       | <b>0.7</b> | 0.2  | 0.2 | 0.2        | 0.4        | 0.2 | -0.2 | <b>0.7</b> | <b>0.7</b> | 0.4 | -0.4 | 0.2 | 0.4 | 0.2 | 0.2 | <table> <tr><td>x</td><td><b>0.7</b></td><td>0.2</td><td>0.2</td></tr> <tr><td>0.2</td><td>0.4</td><td>0.2</td><td>-0.2</td></tr> <tr><td><b>0.7</b></td><td><b>0.7</b></td><td>0.4</td><td>-0.4</td></tr> <tr><td>0.2</td><td>0.4</td><td>0.2</td><td>0.2</td></tr> </table> | x | <b>0.7</b> | 0.2 | 0.2 | 0.2        | 0.4        | 0.2 | -0.2 | <b>0.7</b> | <b>0.7</b> | 0.4 | -0.4 | 0.2 | 0.4 | 0.2 | 0.2 | <table> <tr><td>x</td><td><b>0.7</b></td><td>0.6</td><td>-0.2</td></tr> <tr><td><b>1.1</b></td><td><b>1.7</b></td><td>-0.9</td><td>-0.1</td></tr> <tr><td>0.0</td><td>-0.6</td><td>0.5</td><td>-0.5</td></tr> <tr><td>0.0</td><td>-0.6</td><td>0.5</td><td>-0.5</td></tr> </table> | x | <b>0.7</b> | 0.6 | -0.2 | <b>1.1</b> | <b>1.7</b> | -0.9 | -0.1 | 0.0        | -0.6       | 0.5  | -0.5 | 0.0 | -0.6 | 0.5  | -0.5 | <table> <tr><td>x</td><td><b>0.7</b></td><td>0.6</td><td>-0.2</td></tr> <tr><td><b>1.1</b></td><td><b>1.7</b></td><td>-0.9</td><td>-0.1</td></tr> <tr><td>0.0</td><td>-0.6</td><td>0.5</td><td>-0.5</td></tr> <tr><td>0.0</td><td>-0.6</td><td>0.5</td><td>-0.5</td></tr> </table> | x | <b>0.7</b> | 0.6 | -0.2 | <b>1.1</b> | <b>1.7</b> | -0.9 | -0.1 | 0.0 | -0.6 | 0.5  | -0.5 | 0.0 | -0.6 | 0.5  | -0.5 |
| x                                                                                                                                                                                                                                                                             | <b>0.7</b>                              | 0.2        | 0.2  |     |            |            |     |      |            |            |     |      |     |     |     |     |                                                                                                                                                                                                                                                                               |   |            |     |     |            |            |     |      |            |            |     |      |     |     |     |     |                                                                                                                                                                                                                                                                                    |   |            |     |      |            |            |      |      |            |            |      |      |     |      |      |      |                                                                                                                                                                                                                                                                                    |   |            |     |      |            |            |      |      |     |      |      |      |     |      |      |      |
| 0.2                                                                                                                                                                                                                                                                           | 0.4                                     | 0.2        | -0.2 |     |            |            |     |      |            |            |     |      |     |     |     |     |                                                                                                                                                                                                                                                                               |   |            |     |     |            |            |     |      |            |            |     |      |     |     |     |     |                                                                                                                                                                                                                                                                                    |   |            |     |      |            |            |      |      |            |            |      |      |     |      |      |      |                                                                                                                                                                                                                                                                                    |   |            |     |      |            |            |      |      |     |      |      |      |     |      |      |      |
| <b>0.7</b>                                                                                                                                                                                                                                                                    | <b>0.7</b>                              | 0.4        | -0.4 |     |            |            |     |      |            |            |     |      |     |     |     |     |                                                                                                                                                                                                                                                                               |   |            |     |     |            |            |     |      |            |            |     |      |     |     |     |     |                                                                                                                                                                                                                                                                                    |   |            |     |      |            |            |      |      |            |            |      |      |     |      |      |      |                                                                                                                                                                                                                                                                                    |   |            |     |      |            |            |      |      |     |      |      |      |     |      |      |      |
| 0.2                                                                                                                                                                                                                                                                           | 0.4                                     | 0.2        | 0.2  |     |            |            |     |      |            |            |     |      |     |     |     |     |                                                                                                                                                                                                                                                                               |   |            |     |     |            |            |     |      |            |            |     |      |     |     |     |     |                                                                                                                                                                                                                                                                                    |   |            |     |      |            |            |      |      |            |            |      |      |     |      |      |      |                                                                                                                                                                                                                                                                                    |   |            |     |      |            |            |      |      |     |      |      |      |     |      |      |      |
| x                                                                                                                                                                                                                                                                             | <b>0.7</b>                              | 0.2        | 0.2  |     |            |            |     |      |            |            |     |      |     |     |     |     |                                                                                                                                                                                                                                                                               |   |            |     |     |            |            |     |      |            |            |     |      |     |     |     |     |                                                                                                                                                                                                                                                                                    |   |            |     |      |            |            |      |      |            |            |      |      |     |      |      |      |                                                                                                                                                                                                                                                                                    |   |            |     |      |            |            |      |      |     |      |      |      |     |      |      |      |
| 0.2                                                                                                                                                                                                                                                                           | 0.4                                     | 0.2        | -0.2 |     |            |            |     |      |            |            |     |      |     |     |     |     |                                                                                                                                                                                                                                                                               |   |            |     |     |            |            |     |      |            |            |     |      |     |     |     |     |                                                                                                                                                                                                                                                                                    |   |            |     |      |            |            |      |      |            |            |      |      |     |      |      |      |                                                                                                                                                                                                                                                                                    |   |            |     |      |            |            |      |      |     |      |      |      |     |      |      |      |
| <b>0.7</b>                                                                                                                                                                                                                                                                    | <b>0.7</b>                              | 0.4        | -0.4 |     |            |            |     |      |            |            |     |      |     |     |     |     |                                                                                                                                                                                                                                                                               |   |            |     |     |            |            |     |      |            |            |     |      |     |     |     |     |                                                                                                                                                                                                                                                                                    |   |            |     |      |            |            |      |      |            |            |      |      |     |      |      |      |                                                                                                                                                                                                                                                                                    |   |            |     |      |            |            |      |      |     |      |      |      |     |      |      |      |
| 0.2                                                                                                                                                                                                                                                                           | 0.4                                     | 0.2        | 0.2  |     |            |            |     |      |            |            |     |      |     |     |     |     |                                                                                                                                                                                                                                                                               |   |            |     |     |            |            |     |      |            |            |     |      |     |     |     |     |                                                                                                                                                                                                                                                                                    |   |            |     |      |            |            |      |      |            |            |      |      |     |      |      |      |                                                                                                                                                                                                                                                                                    |   |            |     |      |            |            |      |      |     |      |      |      |     |      |      |      |
| x                                                                                                                                                                                                                                                                             | <b>0.7</b>                              | 0.6        | -0.2 |     |            |            |     |      |            |            |     |      |     |     |     |     |                                                                                                                                                                                                                                                                               |   |            |     |     |            |            |     |      |            |            |     |      |     |     |     |     |                                                                                                                                                                                                                                                                                    |   |            |     |      |            |            |      |      |            |            |      |      |     |      |      |      |                                                                                                                                                                                                                                                                                    |   |            |     |      |            |            |      |      |     |      |      |      |     |      |      |      |
| <b>1.1</b>                                                                                                                                                                                                                                                                    | <b>1.7</b>                              | -0.9       | -0.1 |     |            |            |     |      |            |            |     |      |     |     |     |     |                                                                                                                                                                                                                                                                               |   |            |     |     |            |            |     |      |            |            |     |      |     |     |     |     |                                                                                                                                                                                                                                                                                    |   |            |     |      |            |            |      |      |            |            |      |      |     |      |      |      |                                                                                                                                                                                                                                                                                    |   |            |     |      |            |            |      |      |     |      |      |      |     |      |      |      |
| 0.0                                                                                                                                                                                                                                                                           | -0.6                                    | 0.5        | -0.5 |     |            |            |     |      |            |            |     |      |     |     |     |     |                                                                                                                                                                                                                                                                               |   |            |     |     |            |            |     |      |            |            |     |      |     |     |     |     |                                                                                                                                                                                                                                                                                    |   |            |     |      |            |            |      |      |            |            |      |      |     |      |      |      |                                                                                                                                                                                                                                                                                    |   |            |     |      |            |            |      |      |     |      |      |      |     |      |      |      |
| 0.0                                                                                                                                                                                                                                                                           | -0.6                                    | 0.5        | -0.5 |     |            |            |     |      |            |            |     |      |     |     |     |     |                                                                                                                                                                                                                                                                               |   |            |     |     |            |            |     |      |            |            |     |      |     |     |     |     |                                                                                                                                                                                                                                                                                    |   |            |     |      |            |            |      |      |            |            |      |      |     |      |      |      |                                                                                                                                                                                                                                                                                    |   |            |     |      |            |            |      |      |     |      |      |      |     |      |      |      |
| x                                                                                                                                                                                                                                                                             | <b>0.7</b>                              | 0.6        | -0.2 |     |            |            |     |      |            |            |     |      |     |     |     |     |                                                                                                                                                                                                                                                                               |   |            |     |     |            |            |     |      |            |            |     |      |     |     |     |     |                                                                                                                                                                                                                                                                                    |   |            |     |      |            |            |      |      |            |            |      |      |     |      |      |      |                                                                                                                                                                                                                                                                                    |   |            |     |      |            |            |      |      |     |      |      |      |     |      |      |      |
| <b>1.1</b>                                                                                                                                                                                                                                                                    | <b>1.7</b>                              | -0.9       | -0.1 |     |            |            |     |      |            |            |     |      |     |     |     |     |                                                                                                                                                                                                                                                                               |   |            |     |     |            |            |     |      |            |            |     |      |     |     |     |     |                                                                                                                                                                                                                                                                                    |   |            |     |      |            |            |      |      |            |            |      |      |     |      |      |      |                                                                                                                                                                                                                                                                                    |   |            |     |      |            |            |      |      |     |      |      |      |     |      |      |      |
| 0.0                                                                                                                                                                                                                                                                           | -0.6                                    | 0.5        | -0.5 |     |            |            |     |      |            |            |     |      |     |     |     |     |                                                                                                                                                                                                                                                                               |   |            |     |     |            |            |     |      |            |            |     |      |     |     |     |     |                                                                                                                                                                                                                                                                                    |   |            |     |      |            |            |      |      |            |            |      |      |     |      |      |      |                                                                                                                                                                                                                                                                                    |   |            |     |      |            |            |      |      |     |      |      |      |     |      |      |      |
| 0.0                                                                                                                                                                                                                                                                           | -0.6                                    | 0.5        | -0.5 |     |            |            |     |      |            |            |     |      |     |     |     |     |                                                                                                                                                                                                                                                                               |   |            |     |     |            |            |     |      |            |            |     |      |     |     |     |     |                                                                                                                                                                                                                                                                                    |   |            |     |      |            |            |      |      |            |            |      |      |     |      |      |      |                                                                                                                                                                                                                                                                                    |   |            |     |      |            |            |      |      |     |      |      |      |     |      |      |      |
| (a) DOP: $Q_{tot}(s_1), Q_{tot}(s_2)$                                                                                                                                                                                                                                         | (b) FOP: $Q_{tot}(s_1), Q_{tot}(s_2)$   |            |      |     |            |            |     |      |            |            |     |      |     |     |     |     |                                                                                                                                                                                                                                                                               |   |            |     |     |            |            |     |      |            |            |     |      |     |     |     |     |                                                                                                                                                                                                                                                                                    |   |            |     |      |            |            |      |      |            |            |      |      |     |      |      |      |                                                                                                                                                                                                                                                                                    |   |            |     |      |            |            |      |      |     |      |      |      |     |      |      |      |
| <table> <tr><td>x</td><td><b>0.7</b></td><td>0.2</td><td>0.2</td></tr> <tr><td><b>0.7</b></td><td><b>2.3</b></td><td>0.9</td><td>0.9</td></tr> <tr><td>0.2</td><td>2.3</td><td>0.9</td><td>0.9</td></tr> <tr><td>0.2</td><td>2.2</td><td>0.9</td><td>0.9</td></tr> </table>   | x                                       | <b>0.7</b> | 0.2  | 0.2 | <b>0.7</b> | <b>2.3</b> | 0.9 | 0.9  | 0.2        | 2.3        | 0.9 | 0.9  | 0.2 | 2.2 | 0.9 | 0.9 | <table> <tr><td>x</td><td><b>0.7</b></td><td>0.2</td><td>0.2</td></tr> <tr><td><b>0.7</b></td><td><b>3.2</b></td><td>2.2</td><td>2.2</td></tr> <tr><td>0.2</td><td>3.1</td><td>2.2</td><td>2.2</td></tr> <tr><td>0.2</td><td>3.1</td><td>2.2</td><td>2.2</td></tr> </table>   | x | <b>0.7</b> | 0.2 | 0.2 | <b>0.7</b> | <b>3.2</b> | 2.2 | 2.2  | 0.2        | 3.1        | 2.2 | 2.2  | 0.2 | 3.1 | 2.2 | 2.2 | <table> <tr><td>x</td><td><b>0.5</b></td><td>0.3</td><td>0.2</td></tr> <tr><td>0.3</td><td>1.2</td><td>-0.9</td><td>-1.2</td></tr> <tr><td><b>1.2</b></td><td><b>1.2</b></td><td>-1.0</td><td>-0.5</td></tr> <tr><td>0.2</td><td>-0.7</td><td>-0.9</td><td>-0.1</td></tr> </table> | x | <b>0.5</b> | 0.3 | 0.2  | 0.3        | 1.2        | -0.9 | -1.2 | <b>1.2</b> | <b>1.2</b> | -1.0 | -0.5 | 0.2 | -0.7 | -0.9 | -0.1 | <table> <tr><td>x</td><td><b>0.6</b></td><td>0.2</td><td>0.1</td></tr> <tr><td><b>0.5</b></td><td><b>0.7</b></td><td>-1.2</td><td>-0.0</td></tr> <tr><td>0.3</td><td>0.6</td><td>-1.1</td><td>-0.8</td></tr> <tr><td>0.2</td><td>-2.1</td><td>-0.1</td><td>-1.0</td></tr> </table> | x | <b>0.6</b> | 0.2 | 0.1  | <b>0.5</b> | <b>0.7</b> | -1.2 | -0.0 | 0.3 | 0.6  | -1.1 | -0.8 | 0.2 | -2.1 | -0.1 | -1.0 |
| x                                                                                                                                                                                                                                                                             | <b>0.7</b>                              | 0.2        | 0.2  |     |            |            |     |      |            |            |     |      |     |     |     |     |                                                                                                                                                                                                                                                                               |   |            |     |     |            |            |     |      |            |            |     |      |     |     |     |     |                                                                                                                                                                                                                                                                                    |   |            |     |      |            |            |      |      |            |            |      |      |     |      |      |      |                                                                                                                                                                                                                                                                                    |   |            |     |      |            |            |      |      |     |      |      |      |     |      |      |      |
| <b>0.7</b>                                                                                                                                                                                                                                                                    | <b>2.3</b>                              | 0.9        | 0.9  |     |            |            |     |      |            |            |     |      |     |     |     |     |                                                                                                                                                                                                                                                                               |   |            |     |     |            |            |     |      |            |            |     |      |     |     |     |     |                                                                                                                                                                                                                                                                                    |   |            |     |      |            |            |      |      |            |            |      |      |     |      |      |      |                                                                                                                                                                                                                                                                                    |   |            |     |      |            |            |      |      |     |      |      |      |     |      |      |      |
| 0.2                                                                                                                                                                                                                                                                           | 2.3                                     | 0.9        | 0.9  |     |            |            |     |      |            |            |     |      |     |     |     |     |                                                                                                                                                                                                                                                                               |   |            |     |     |            |            |     |      |            |            |     |      |     |     |     |     |                                                                                                                                                                                                                                                                                    |   |            |     |      |            |            |      |      |            |            |      |      |     |      |      |      |                                                                                                                                                                                                                                                                                    |   |            |     |      |            |            |      |      |     |      |      |      |     |      |      |      |
| 0.2                                                                                                                                                                                                                                                                           | 2.2                                     | 0.9        | 0.9  |     |            |            |     |      |            |            |     |      |     |     |     |     |                                                                                                                                                                                                                                                                               |   |            |     |     |            |            |     |      |            |            |     |      |     |     |     |     |                                                                                                                                                                                                                                                                                    |   |            |     |      |            |            |      |      |            |            |      |      |     |      |      |      |                                                                                                                                                                                                                                                                                    |   |            |     |      |            |            |      |      |     |      |      |      |     |      |      |      |
| x                                                                                                                                                                                                                                                                             | <b>0.7</b>                              | 0.2        | 0.2  |     |            |            |     |      |            |            |     |      |     |     |     |     |                                                                                                                                                                                                                                                                               |   |            |     |     |            |            |     |      |            |            |     |      |     |     |     |     |                                                                                                                                                                                                                                                                                    |   |            |     |      |            |            |      |      |            |            |      |      |     |      |      |      |                                                                                                                                                                                                                                                                                    |   |            |     |      |            |            |      |      |     |      |      |      |     |      |      |      |
| <b>0.7</b>                                                                                                                                                                                                                                                                    | <b>3.2</b>                              | 2.2        | 2.2  |     |            |            |     |      |            |            |     |      |     |     |     |     |                                                                                                                                                                                                                                                                               |   |            |     |     |            |            |     |      |            |            |     |      |     |     |     |     |                                                                                                                                                                                                                                                                                    |   |            |     |      |            |            |      |      |            |            |      |      |     |      |      |      |                                                                                                                                                                                                                                                                                    |   |            |     |      |            |            |      |      |     |      |      |      |     |      |      |      |
| 0.2                                                                                                                                                                                                                                                                           | 3.1                                     | 2.2        | 2.2  |     |            |            |     |      |            |            |     |      |     |     |     |     |                                                                                                                                                                                                                                                                               |   |            |     |     |            |            |     |      |            |            |     |      |     |     |     |     |                                                                                                                                                                                                                                                                                    |   |            |     |      |            |            |      |      |            |            |      |      |     |      |      |      |                                                                                                                                                                                                                                                                                    |   |            |     |      |            |            |      |      |     |      |      |      |     |      |      |      |
| 0.2                                                                                                                                                                                                                                                                           | 3.1                                     | 2.2        | 2.2  |     |            |            |     |      |            |            |     |      |     |     |     |     |                                                                                                                                                                                                                                                                               |   |            |     |     |            |            |     |      |            |            |     |      |     |     |     |     |                                                                                                                                                                                                                                                                                    |   |            |     |      |            |            |      |      |            |            |      |      |     |      |      |      |                                                                                                                                                                                                                                                                                    |   |            |     |      |            |            |      |      |     |      |      |      |     |      |      |      |
| x                                                                                                                                                                                                                                                                             | <b>0.5</b>                              | 0.3        | 0.2  |     |            |            |     |      |            |            |     |      |     |     |     |     |                                                                                                                                                                                                                                                                               |   |            |     |     |            |            |     |      |            |            |     |      |     |     |     |     |                                                                                                                                                                                                                                                                                    |   |            |     |      |            |            |      |      |            |            |      |      |     |      |      |      |                                                                                                                                                                                                                                                                                    |   |            |     |      |            |            |      |      |     |      |      |      |     |      |      |      |
| 0.3                                                                                                                                                                                                                                                                           | 1.2                                     | -0.9       | -1.2 |     |            |            |     |      |            |            |     |      |     |     |     |     |                                                                                                                                                                                                                                                                               |   |            |     |     |            |            |     |      |            |            |     |      |     |     |     |     |                                                                                                                                                                                                                                                                                    |   |            |     |      |            |            |      |      |            |            |      |      |     |      |      |      |                                                                                                                                                                                                                                                                                    |   |            |     |      |            |            |      |      |     |      |      |      |     |      |      |      |
| <b>1.2</b>                                                                                                                                                                                                                                                                    | <b>1.2</b>                              | -1.0       | -0.5 |     |            |            |     |      |            |            |     |      |     |     |     |     |                                                                                                                                                                                                                                                                               |   |            |     |     |            |            |     |      |            |            |     |      |     |     |     |     |                                                                                                                                                                                                                                                                                    |   |            |     |      |            |            |      |      |            |            |      |      |     |      |      |      |                                                                                                                                                                                                                                                                                    |   |            |     |      |            |            |      |      |     |      |      |      |     |      |      |      |
| 0.2                                                                                                                                                                                                                                                                           | -0.7                                    | -0.9       | -0.1 |     |            |            |     |      |            |            |     |      |     |     |     |     |                                                                                                                                                                                                                                                                               |   |            |     |     |            |            |     |      |            |            |     |      |     |     |     |     |                                                                                                                                                                                                                                                                                    |   |            |     |      |            |            |      |      |            |            |      |      |     |      |      |      |                                                                                                                                                                                                                                                                                    |   |            |     |      |            |            |      |      |     |      |      |      |     |      |      |      |
| x                                                                                                                                                                                                                                                                             | <b>0.6</b>                              | 0.2        | 0.1  |     |            |            |     |      |            |            |     |      |     |     |     |     |                                                                                                                                                                                                                                                                               |   |            |     |     |            |            |     |      |            |            |     |      |     |     |     |     |                                                                                                                                                                                                                                                                                    |   |            |     |      |            |            |      |      |            |            |      |      |     |      |      |      |                                                                                                                                                                                                                                                                                    |   |            |     |      |            |            |      |      |     |      |      |      |     |      |      |      |
| <b>0.5</b>                                                                                                                                                                                                                                                                    | <b>0.7</b>                              | -1.2       | -0.0 |     |            |            |     |      |            |            |     |      |     |     |     |     |                                                                                                                                                                                                                                                                               |   |            |     |     |            |            |     |      |            |            |     |      |     |     |     |     |                                                                                                                                                                                                                                                                                    |   |            |     |      |            |            |      |      |            |            |      |      |     |      |      |      |                                                                                                                                                                                                                                                                                    |   |            |     |      |            |            |      |      |     |      |      |      |     |      |      |      |
| 0.3                                                                                                                                                                                                                                                                           | 0.6                                     | -1.1       | -0.8 |     |            |            |     |      |            |            |     |      |     |     |     |     |                                                                                                                                                                                                                                                                               |   |            |     |     |            |            |     |      |            |            |     |      |     |     |     |     |                                                                                                                                                                                                                                                                                    |   |            |     |      |            |            |      |      |            |            |      |      |     |      |      |      |                                                                                                                                                                                                                                                                                    |   |            |     |      |            |            |      |      |     |      |      |      |     |      |      |      |
| 0.2                                                                                                                                                                                                                                                                           | -2.1                                    | -0.1       | -1.0 |     |            |            |     |      |            |            |     |      |     |     |     |     |                                                                                                                                                                                                                                                                               |   |            |     |     |            |            |     |      |            |            |     |      |     |     |     |     |                                                                                                                                                                                                                                                                                    |   |            |     |      |            |            |      |      |            |            |      |      |     |      |      |      |                                                                                                                                                                                                                                                                                    |   |            |     |      |            |            |      |      |     |      |      |      |     |      |      |      |
| (c) VDAC: $Q_{tot}(s_1), Q_{tot}(s_2)$                                                                                                                                                                                                                                        | (d) QTRAN: $Q_{tot}(s_1), Q_{tot}(s_2)$ |            |      |     |            |            |     |      |            |            |     |      |     |     |     |     |                                                                                                                                                                                                                                                                               |   |            |     |     |            |            |     |      |            |            |     |      |     |     |     |     |                                                                                                                                                                                                                                                                                    |   |            |     |      |            |            |      |      |            |            |      |      |     |      |      |      |                                                                                                                                                                                                                                                                                    |   |            |     |      |            |            |      |      |     |      |      |      |     |      |      |      |

Table 2: Matrix results for other Benchmarks.

### A.2.2 Predator-Prey

A partially observable environment on a grid-world predator-prey task is used to model relative overgeneralization problem [24] where 8 agents have to catch 8 prey in a  $10 \times 10$  grid. Each agent can either move in one of the 4 compass directions, remain still, or try to catch any adjacent prey. Impossible actions, i.e., moves into an occupied target position or catching when there is no adjacent prey, are treated as unavailable. If two adjacent agents execute the catch action, a prey is caught and both the prey and the catching agents are removed from the grid. An agent's observation is a  $5 \times 5$  sub-grid centered around it, with one channel showing agents and another indicating prey. An episode ends if all agents have been removed or after 200 time steps. Capturing a prey is rewarded with  $r = 10$ , but unsuccessful attempts by single agents are punished by a negative reward  $p$ . In this paper we consider two sets of experiments with  $p = 0$  and  $p = -2$ . The task is similart to matrix game proposed by [5] but significantly more complex, both in terms of the optimal policy and in the number of agents.

| map        | Ally Units                         | Enemy Units                        |
|------------|------------------------------------|------------------------------------|
| 1c3s5z     | 1 Colossus, 3 Stalkers & 5 Zealots | 1 Colossus, 3 Stalkers & 5 Zealots |
| 3m         | 3 Marines                          | 3 Marines                          |
| 3s5z       | 3 Stalkers & 5 Zealots             | 3 Stalkers & 5 Zealots             |
| 8m         | 8 Marines                          | 8 Marines                          |
| 3s_vs_5z   | 3 Stalkers                         | 5 Zealots                          |
| 5m_vs_6m   | 5 Marines                          | 6 Marines                          |
| MMM2       | 1 Medivac, 2 Marauders & 7 Marines | 1 Medivac, 3 Marauders & 8 Marines |
| 27m_vs_30m | 27 Marines                         | 30 Marines                         |
| 6h_vs_8z   | 6 Hydralisks                       | 8 Zealots                          |
| corridor   | 6 Zealots                          | 24 Zerglings                       |

Table 3: Brief Introduction of SMAC map scenarios used in experiments

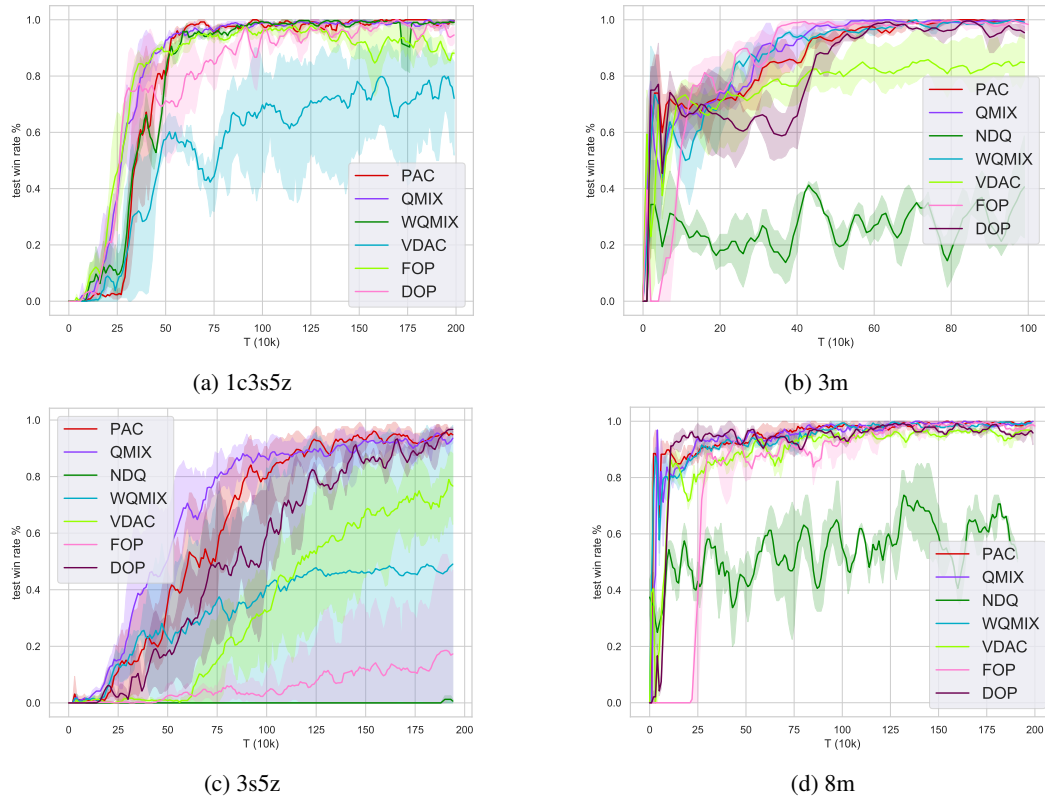

Figure 6: Additional results on SMAC benchmark

### A.2.3 SMAC

For the experiments on StarCraft II micromanagement, we follow the setup of SMAC [8] with open-source implementation including QMIX [4], WQMIX [6], NDQ [11], FOP [13], DOP [12] and VDAC [14]. We consider combat scenarios where the enemy units are controlled by the StarCraft II built-in AI and the friendly units are controlled by the algorithm-trained agent. The possible options for built-in AI difficulties are Very Easy, Easy, Medium, Hard, Very Hard, and Insane, ranging from 0 to 7. We carry out the experiments with ally units controlled by a learning agent while built-in AI controls the enemy units with difficulty = 7 (Insane). Depending on the specific scenarios (maps), the units of the enemy and friendly can be symmetric or asymmetric. At each time step each agent chooses one action from discrete action space, including noop, move[direction], attack[enemy\_id] and stop. Dead units can only choose noop action. Killing an enemy unit will result in a reward

of 10 while winning by eliminating all enemy units will result in a reward of 200. The global state information are only available in the centralized critic. Each baseline algorithm is trained with 4 random seeds and evaluated every 10k training steps with 32 testing episodes for main results, and with 3 random seeds for ablation results and additional results. We carried out our experiment on a Nvidia GeForce RTX 2080 Ti workstation, on average it takes 3.5 hours to finish 3s5z map on SMAC environment for one run.

**Additional Results** We present additional results on easier maps including 1c3s5z, 3m, 3s5z, and 8m in Fig. 1.

|                      | self-updating alpha | Q * Network | L_ca            | L_ib |
|----------------------|---------------------|-------------|-----------------|------|
| PAC                  | Y                   | Y           | Y               | Y    |
| PAC_no_info          | Y                   | Y           | Y               |      |
| PAC_fixed_alpha      | alpha = 1.0         | Y           | Y               | Y    |
| PAC_CE_Loss          | Y                   | Y           | replace with CE | Y    |
| <b>PAC_disabled*</b> | Y                   | Y           |                 |      |
| PAC_No_Q             | Y                   |             |                 |      |

Table 4: Comparison of our method and its ablated versions

#### A.2.4 Implementation details and Hyper-parameters

In this section we introduce the implementation details and hyper-parameters we used in the experiment. Recently [22] demonstrated that MARL algorithms are significantly influenced by code-level optimization and other tricks, e.g. using TD-lambda, Adam optimizer and grid-searched hyper-parameters (where many state-of-the-art are already adopted), and proposed fine-tuned QMIX and WQMIX, which is demonstrated with significant improvements from their original implementation. We implemented our algorithm based on its open-sourced codebase and acquired the results of QMIX and WQMIX from it. We use one set of hyper-parameters for each environment, i.e., no tuned hyper-para for individual maps. Unless otherwise mentioned, we keep the same setting for common hyper-parameters shared by all algorithms, e.g. learning rate, and keep their unique hyper-parameters to their default settings.

We use epsilon greedy for action selection with annealing from  $\epsilon = 0.995$  decreasing to  $\epsilon = 0.05$  in 100000 training steps in a linear way.

Batch size  $bs = 128$ , replay buffer size = 10000

Target network update interval: every 200 episodes

$\beta = 0.001$ , since  $o_i$  and  $\hat{u}_i^*$  are within similar dimensions and thus does not require very high compression.

Weights  $w = 0.5$  in weighting functions.

learning rate  $lr = 0.001$

td lambda  $\lambda = 0.6$

initial entropy term  $\log \alpha = -0.07$ , with its learning rate  $lr_\alpha = 0.0003$

performance for each algorithm is evaluated for 32 episodes every 1000 training steps.

#### A.2.5 Hyperparameter-tuning for ablation studies

To fully demonstrate the effectiveness of each components, we performed hyperparameter-tuning for each ablated settings. Specifically, we choose exploration steps (epsilon anneal time = [50k, 100k], where  $\epsilon$  decays from 0.095 to 0.05 in  $\epsilon$ -greedy), eligibility traces ( $\lambda = [0.3, 0.5, 0.6]$  in TD- $\lambda$ ), and replay-buffer size (buffer = [5000, 10000]) and use the results with best performance to serve as the ablated results. We show the optimal hyperparameter setting for each ablated versions and their corresponding final winning rates on SMAC environment as in Table 4.

| Setting         | Optimal Hyperparameter Setting                              | Average Winning Rates |
|-----------------|-------------------------------------------------------------|-----------------------|
| PAC             | $\lambda=0.5$ buffer_size=10000, epsilon_anneal_time=100000 | 0.87                  |
| PAC_Fixed_alpha | $\lambda=0.6$ buffer_size=5000, epsilon_anneal_time=80000   | 0.80                  |
| PAC_no_info     | $\lambda=0.6$ buffer_size=10000, epsilon_anneal_time=100000 | 0.51                  |
| PAC_CE_loss     | $\lambda=0.5$ buffer_size=10000, epsilon_anneal_time=100000 | 0.61                  |
| PAC_disabled    | $\lambda=0.5$ buffer_size=5000, epsilon_anneal_time=80000   | 0.49                  |
| PAC_No_Q*       | $\lambda=0.6$ buffer_size=10000, epsilon_anneal_time=100000 | 0.25                  |

Table 5: Optimal Hyperparameter Setting for ablated versions
